# Supplementary material for: Fibroblast rejuvenation by mechanical reprogramming and redifferentiation
Source: PubMed Central journal article supplement (PMC7229653; doi:10.1073/pnas.1911497117), 2020-04-29
Supplement: pnas.1911497117.sapp.pdf [file pnas.1911497117.sapp.pdf]

**SUPPLEMENTARY FIGURES**

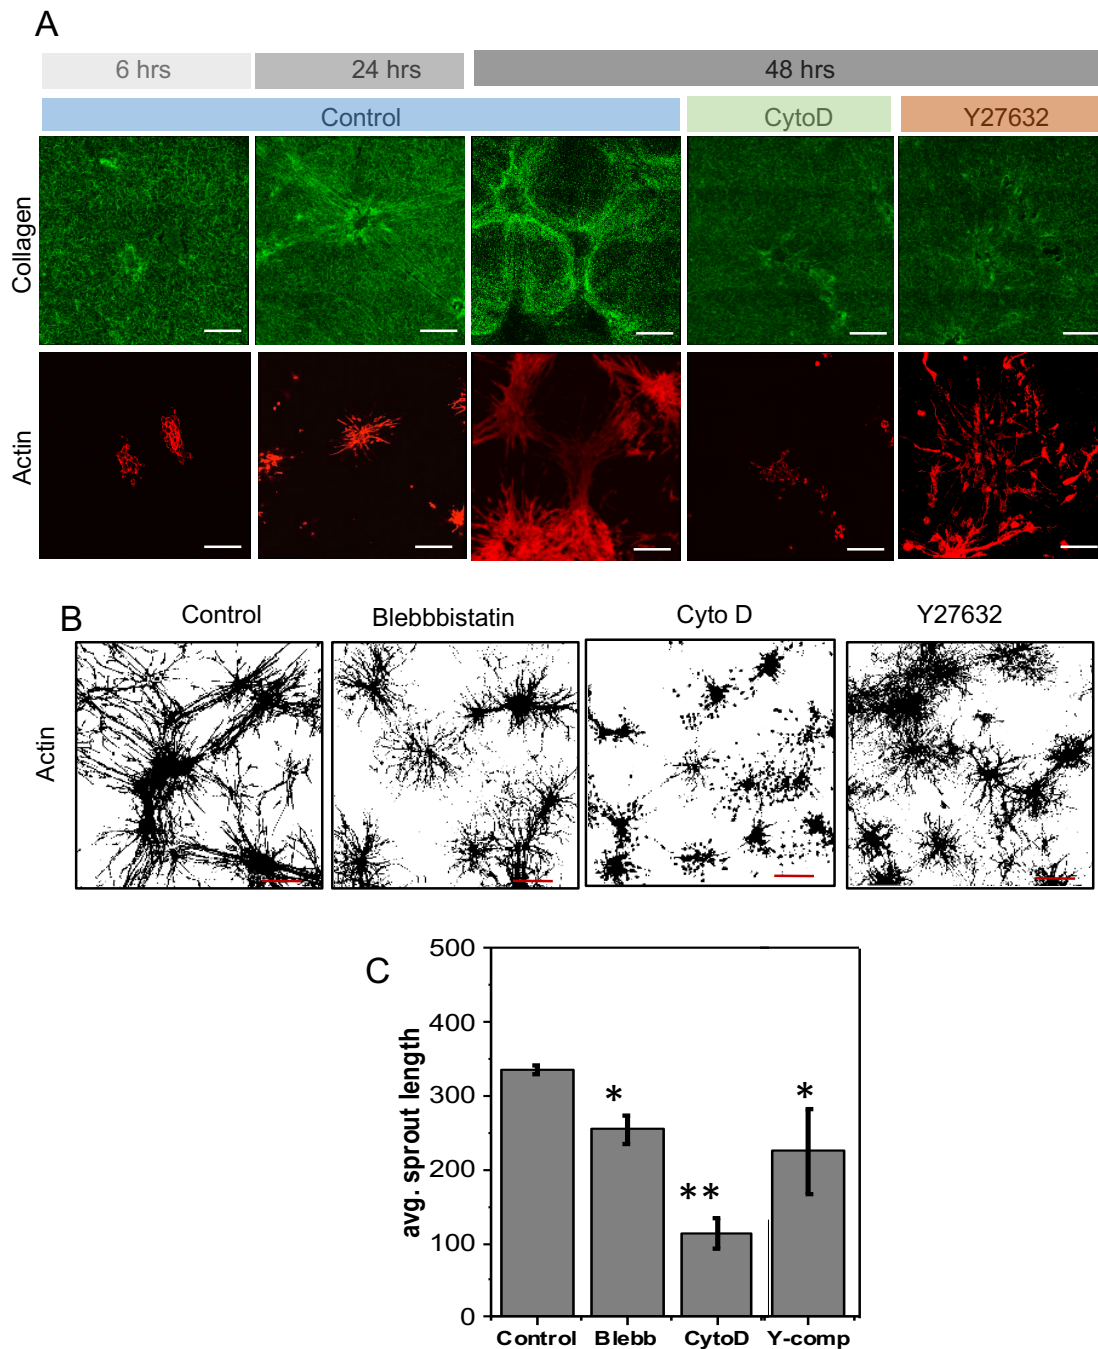

**Figure S1.** Dependency on cytoskeletal elements to maintain contractility of the fibroblasts in 3D collagen matrix. (A) Representative fluorescence micrographs of immunostained collagen matrix at different time points in sprouting and in response to different cytoskeletal drug treatments. Corresponding phalloidin-stained actin images represent sprouting efficiencies; scale bar: 100 $\mu$ m; (B) Representative inverted images of cells stained with phalloidin, in response to different cytoskeletal drug treatments; scale bar: 100 $\mu$ m; (C) Corresponding quantification of sprouting efficiencies based on average sprout lengths. Error bars represent SD; \*P < 0.05; \*\*P < 0.01; Student's t-test.

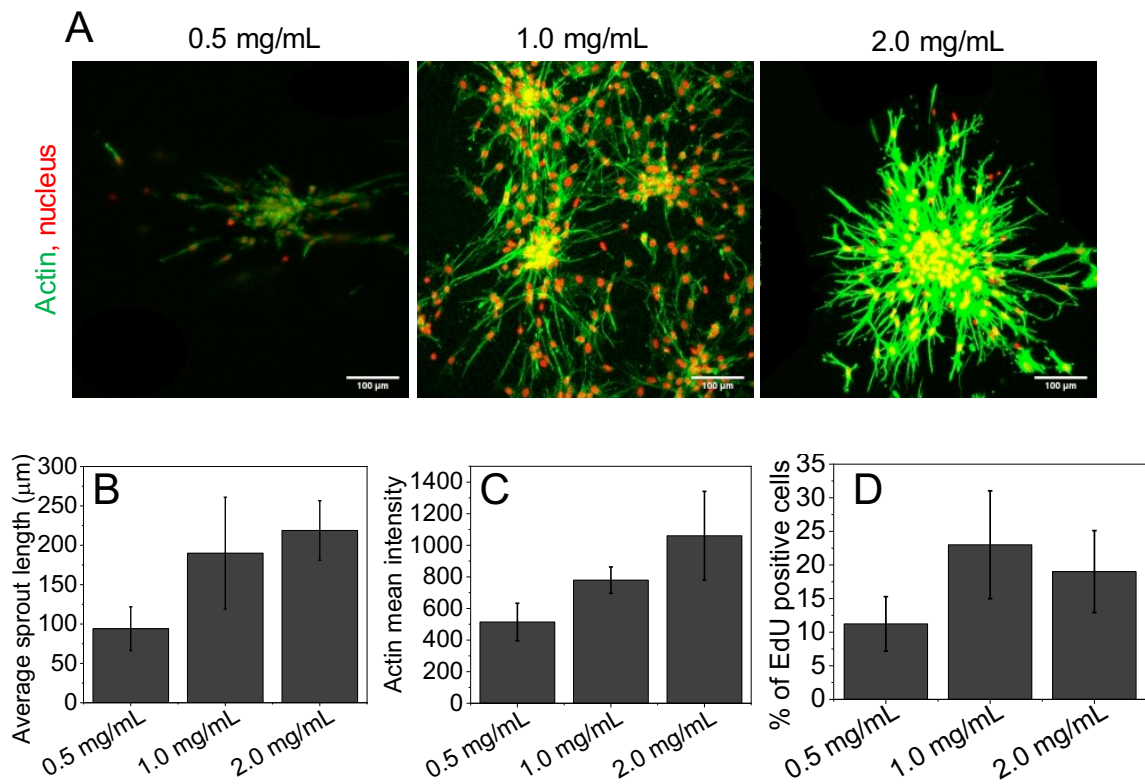

**Figure S2.** (A) Representative sprouting images of FCG on collagen matrices of varying densities. Cells are stained with phalloidin to label actin; scale bar: 30 $\mu\text{m}$ . (B-D) Sprouting efficiencies, contractility, and proliferation levels at varying matrix density measured by average sprout length, mean actin intensities, and percentages of EdU-positive cells in each field of view, respectively. Error bars represent  $\pm$  SD.

A

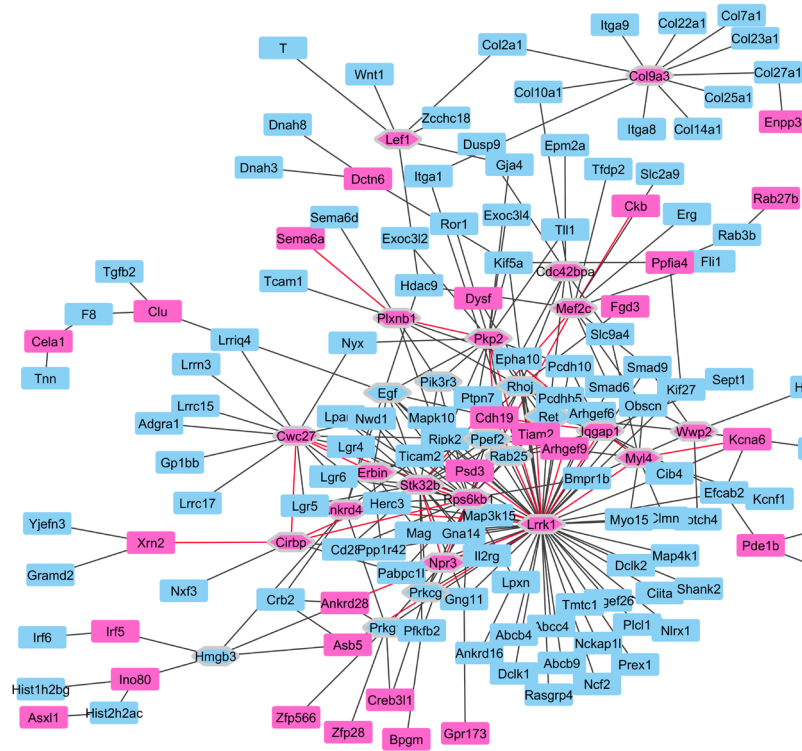

B

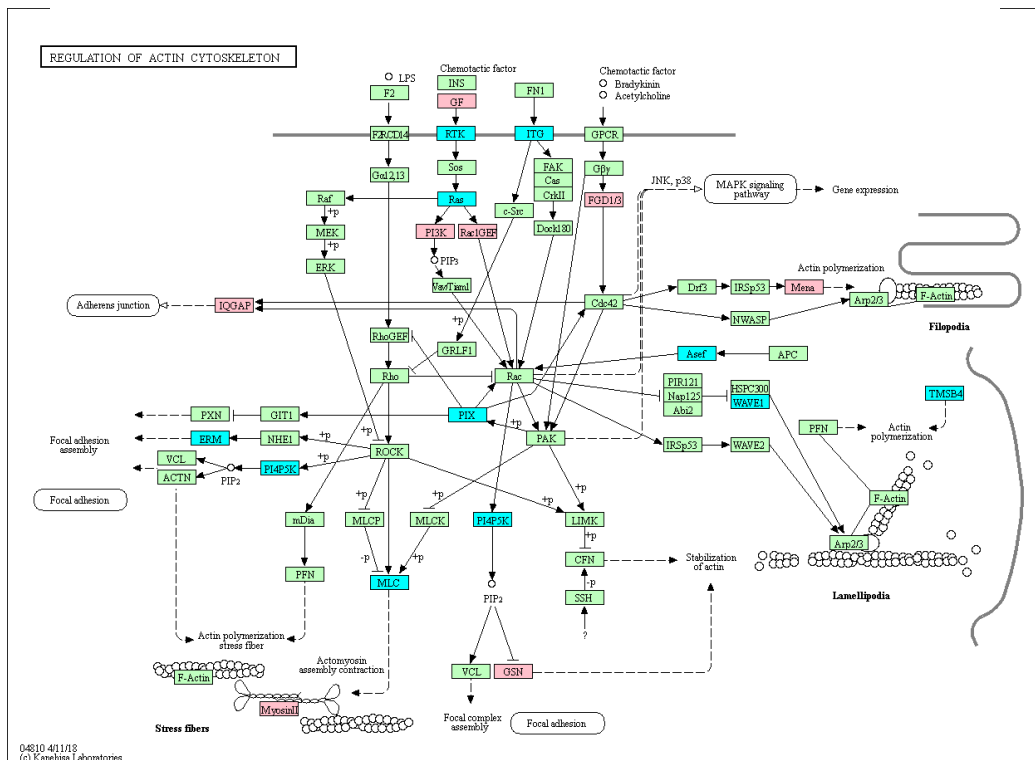

**Figure S3.** (A) Network analysis providing a functional context to the up-regulated gene list in redifferentiated RF compared to FCG. All genes in the network are up-regulated (Fold change > 1.41) in Fibroblasts', with those in pink representing significant connection nodes (FDR (adjusted p value) < 0.1). Hexagon-shaped genes have many connections to others (with degree higher than 5). (B) KEGG maps for upregulated and downregulated genes in RF and 3T3 clumps embedded in FCG. Pink box refers to the upregulated genes in RF. Cyan box refers to the down regulated genes in RF.

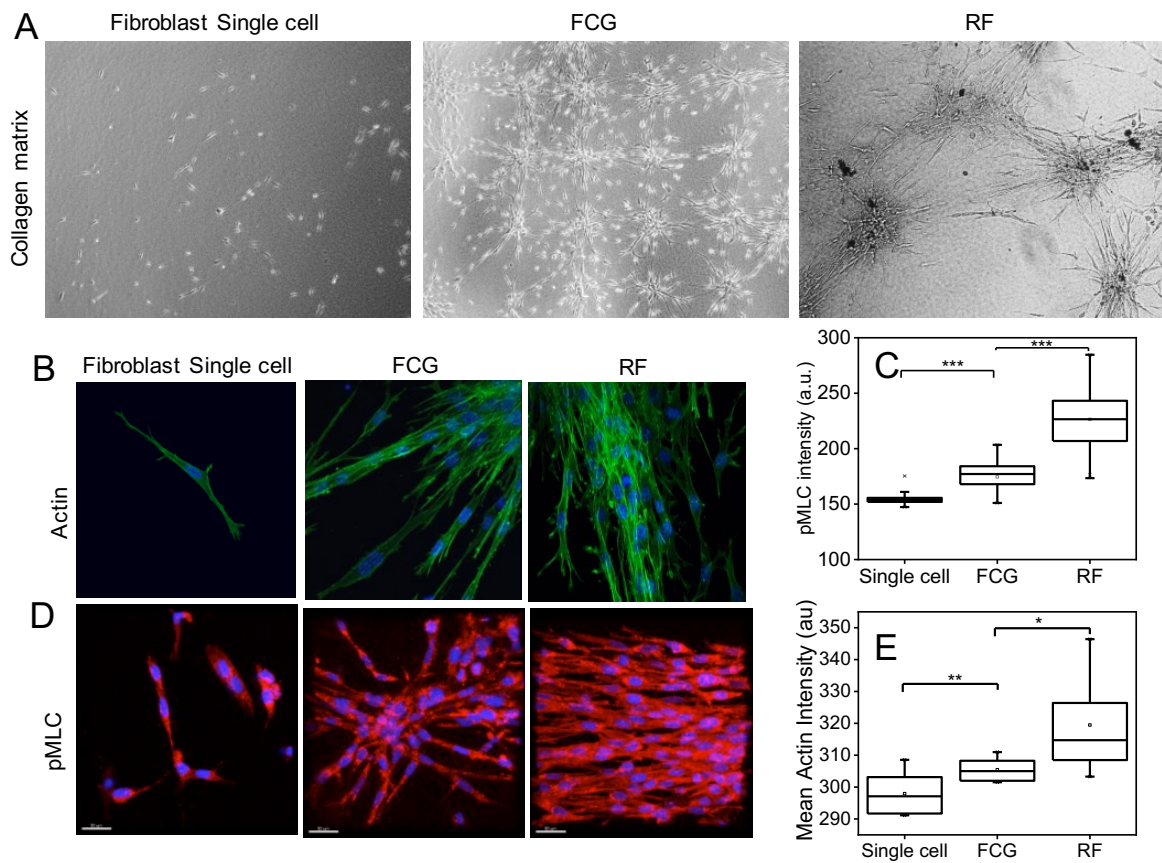

**Figure S4.** (A) Representative bright field images of cells in the matrix after Matrix incorporated on top of the cells attached on the micropatterns. (B and D) Representative actin and pMLC immunofluorescence micrographs of these three conditions; scale bar:  $20\mu\text{m}$ . (C and E) Corresponding intensity box plots.  $n=45, 78$  and  $123$  for single cell, FCG and RF conditions, respectively,  $*P < 0.05$ ;  $**P < 0.01$ ;  $***P < 0.001$ ; Two-sided Student's t-test were used.

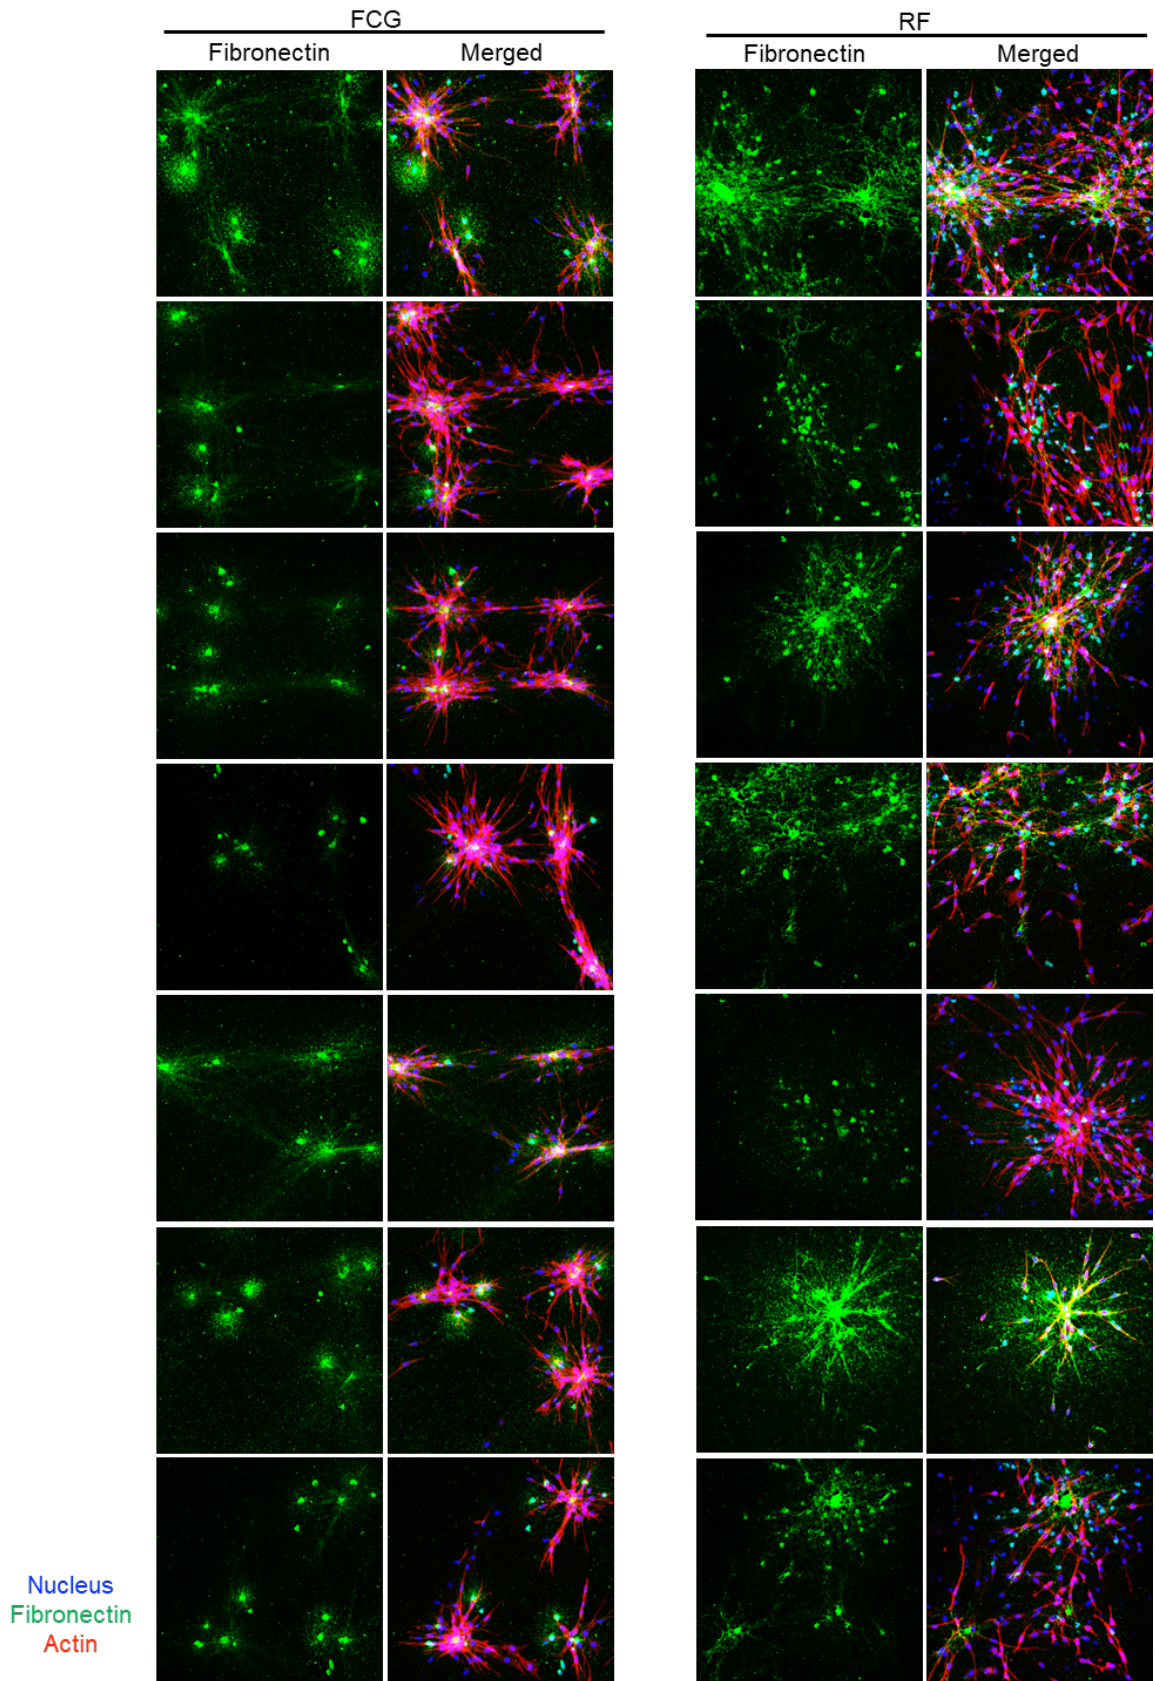

**Figure S5.** Collage of immunofluorescence micrographs of extracellular fibronectin deposited on to the matrix in these two conditions. In merged images, nucleus is in blue, fibronectin in green and actin in red.

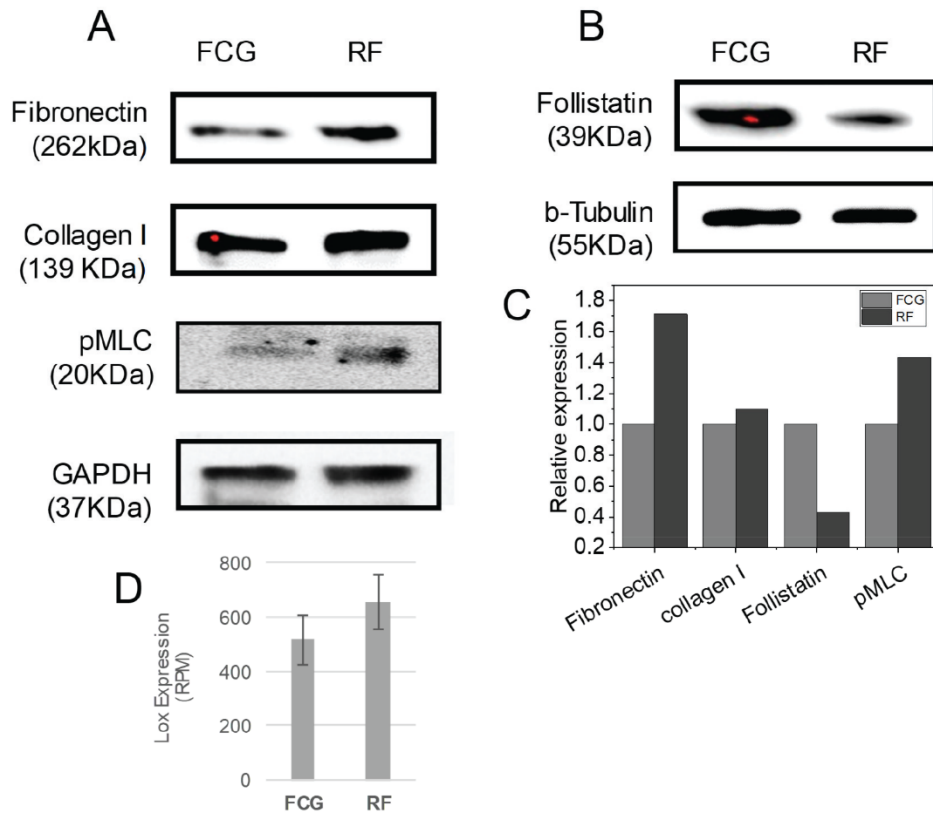

**Figure S6.** (A and B) Western blots for the selected proteins levels in FCG and RF condition. (C) Quantification plots of the blots for Fibronectin, Collagen I and pMLC with loading control of GAPDH and for Follistatin with loading control of b-Tubulin; (D) Lox expression plot (RNAseq),

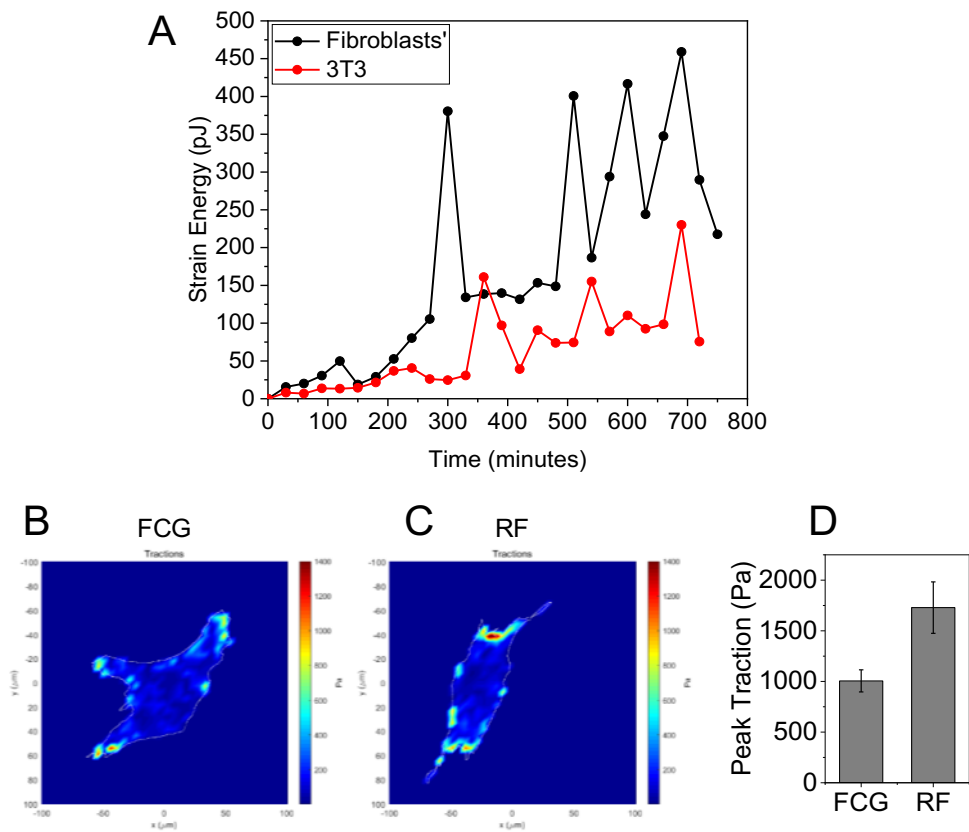

**Figure S7.** (A) Energy plots depicting strain energy exerted on the matrix by RF and FCG. (B and C) Representative 2D traction map of FCG and RF cells. (D) Peak traction plot of FCG and RF cells.

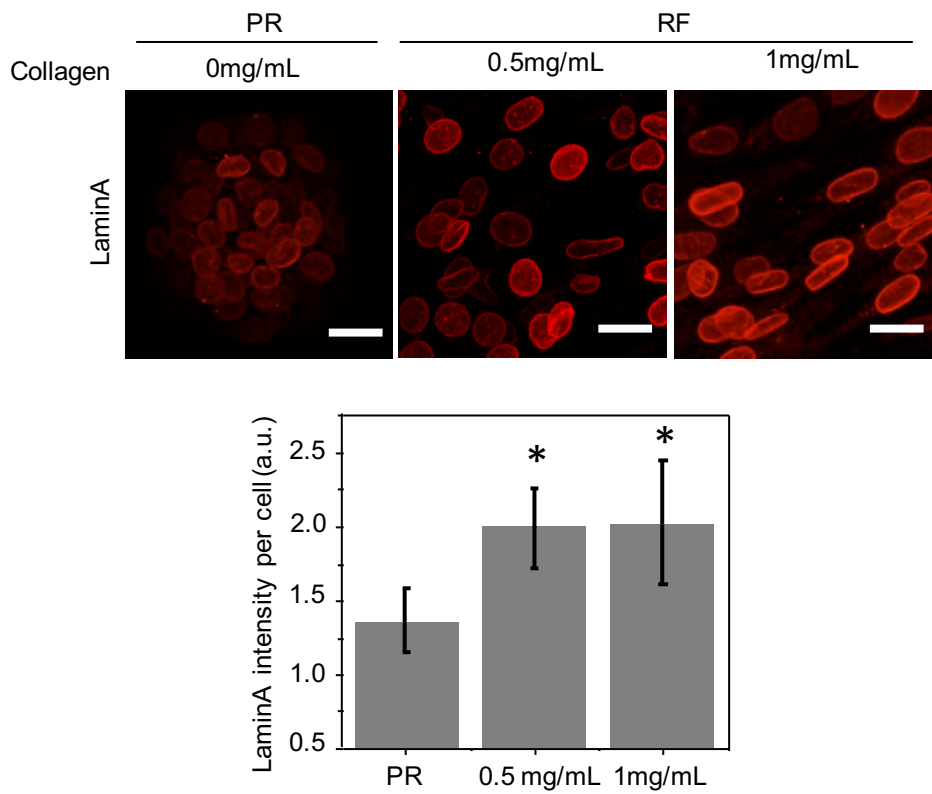

**Figure S8.** Representative LaminA immunofluorescence micrographs of the nuclei in PR and PR embedded in matrices with varying collagen concentrations (0.5 and 1mg/ml). Scale bar: 20 $\mu$ m. (E) Corresponding bar plots of LaminA intensities. Error bars represent SD; \*P < 0.05; Student's t-test.



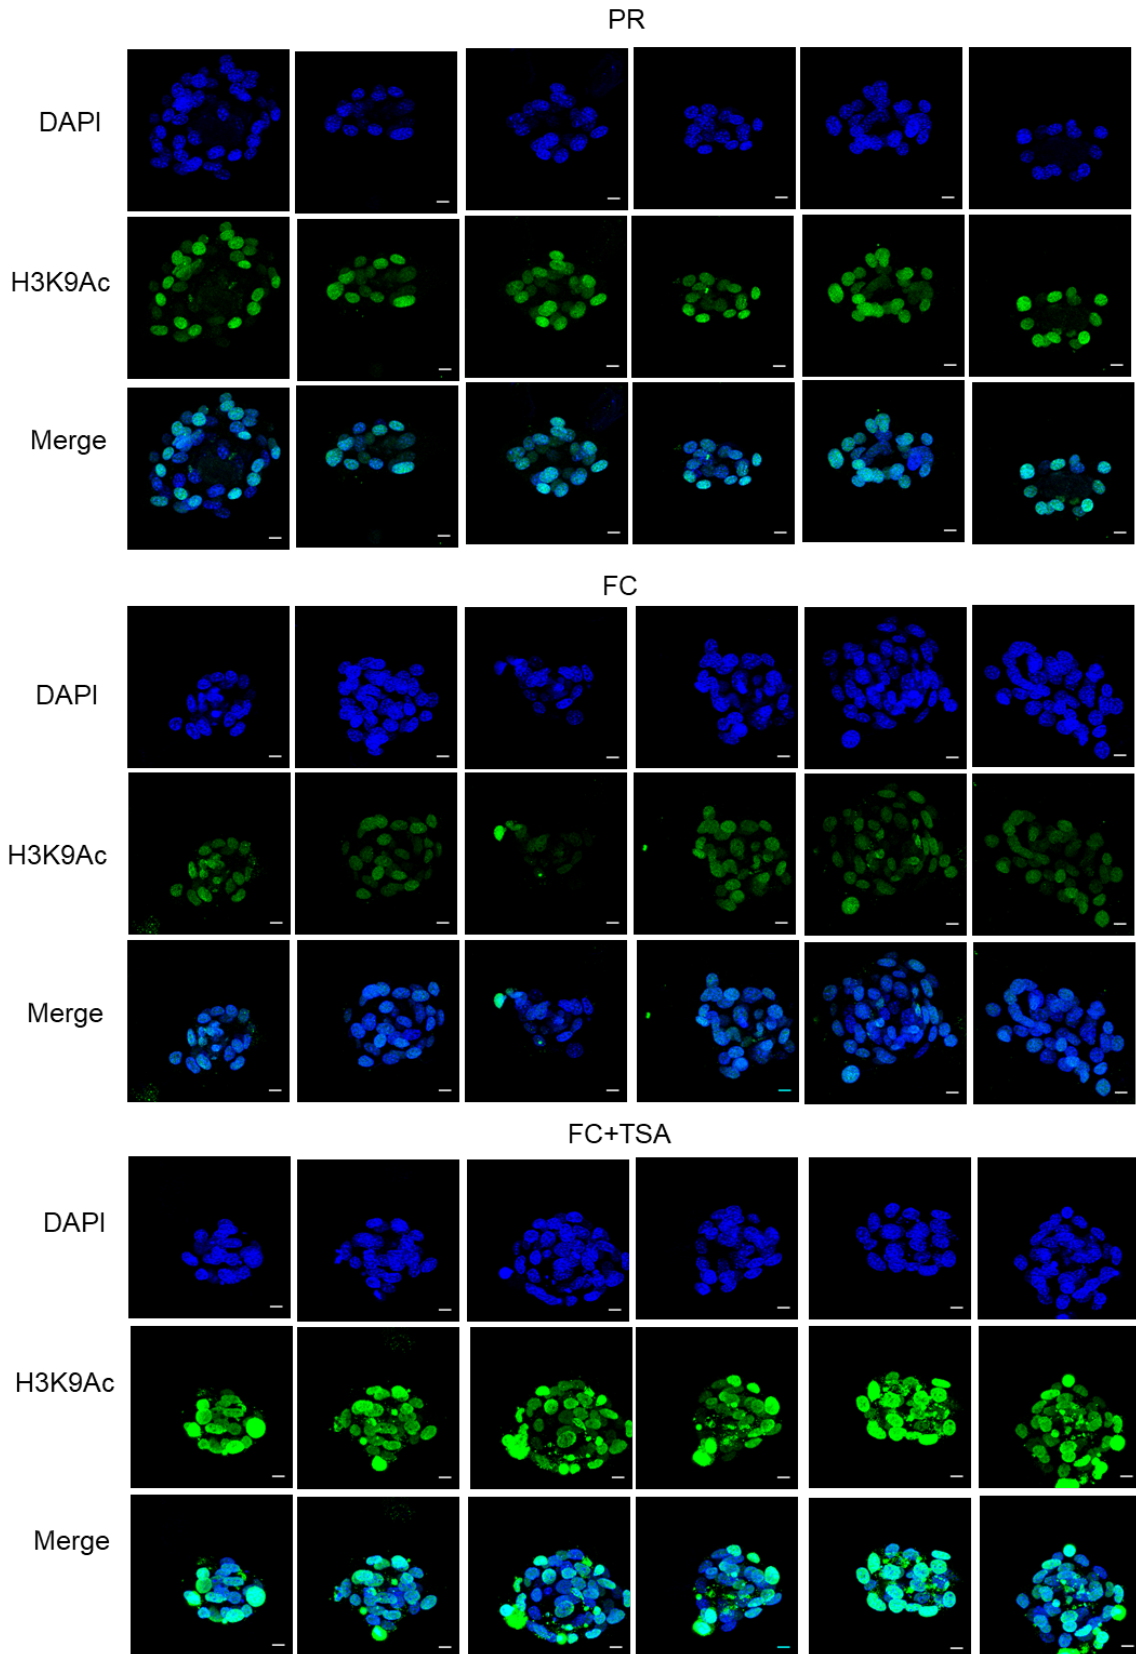

**Figure S9.** Collage of immunofluorescence micrographs of H3K9Ac levels in the nuclei in partially reprogrammed cell (PR), fibroblast clump (FC) and FC+ TSA treated without gel conditions; scale bar:  $10\mu\text{m}$ .

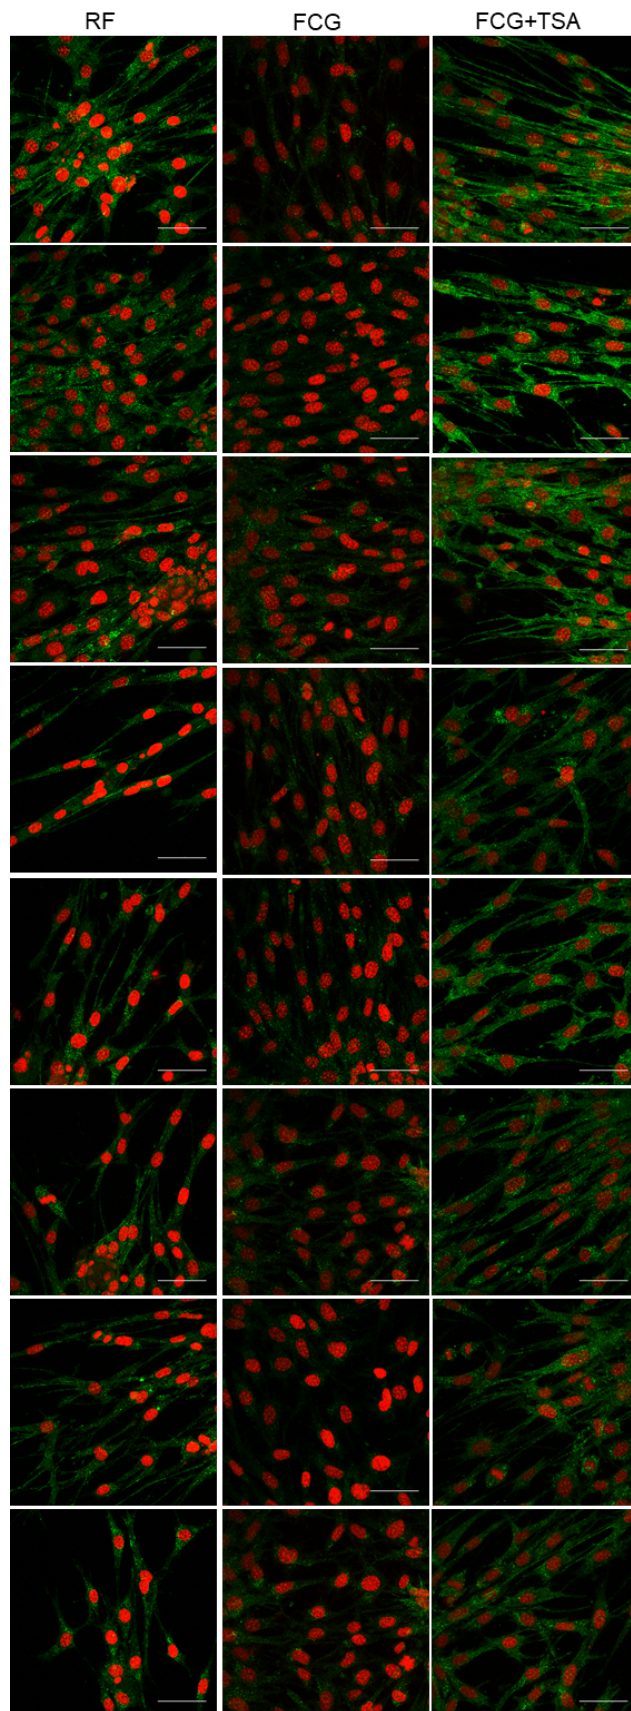

**Figure S10.** Collage of pMLC immunofluorescence micrographs of the RF, FCG and FCG+TSA-treated cells embedded in collagen matrix. Nucleus is in red; scale bar: 20 $\mu$ m.

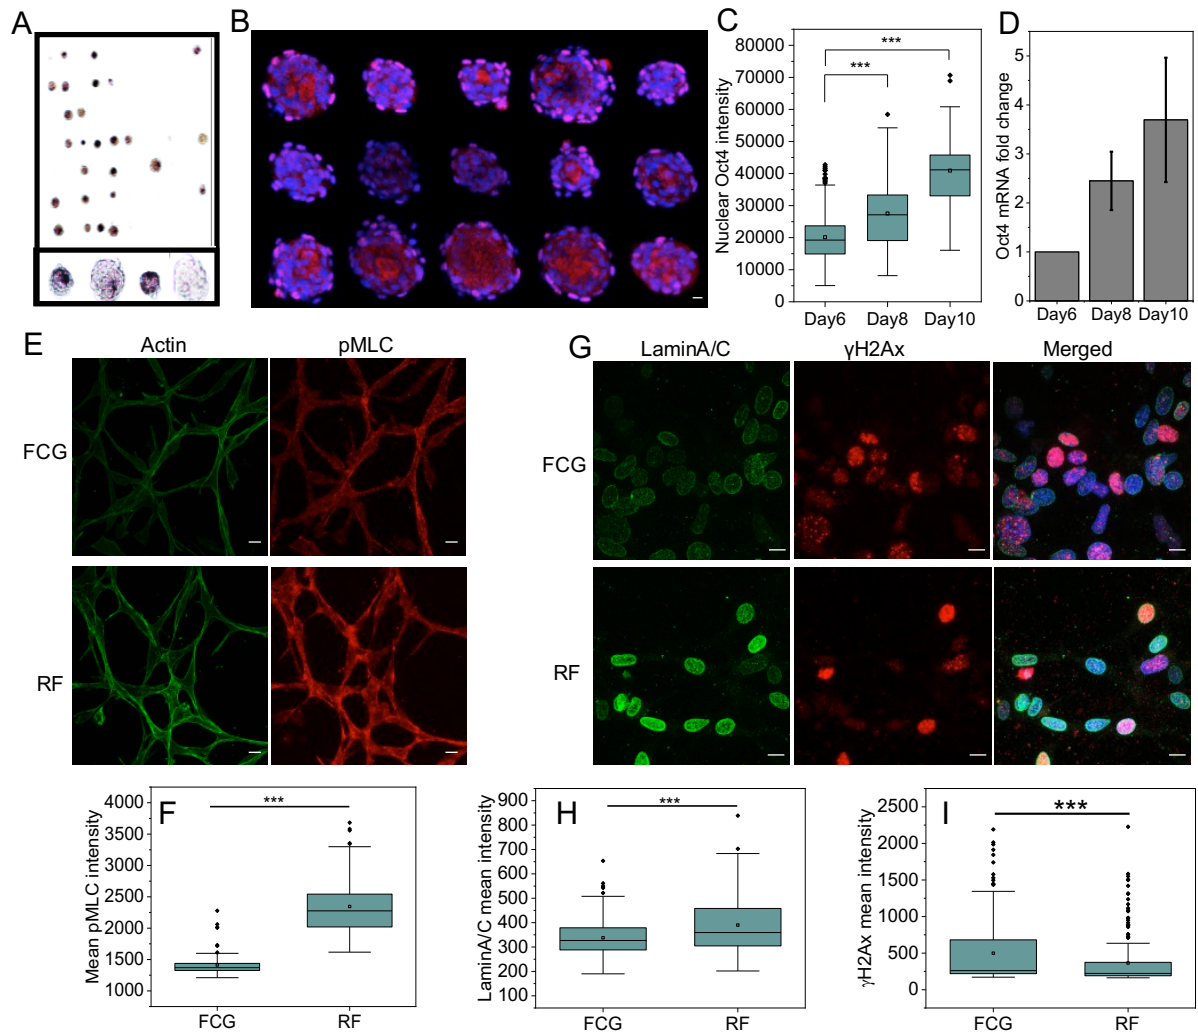

**Figure S11.** Partial reprogramming and rejuvenation of human foreskin fibroblasts (BJ). (A) Field view of 10days old BJ spheroids with alkaline phosphatase (AP) staining, inset: collage of enlarged spheroids with AP staining; (B) Collage micrograph of BJ spheroids immunostained with Oct4, scale bar:  $10\mu\text{m}$ ; (C) Oct4 fluorescence intensity plot of BJ spheroids at day6, day8 and day10. Error bars represent SD;  $***P < 0.001$ ; Student's t test. (D) The mRNA level of Oct4 normalized with respect to the mRNA level at day6 BJ spheroids ( $n = 3$  samples). Error bars represent SD. (E) Representative actin and pMLC immunofluorescence micrograph of RF and FCG of BJ cells embedded in  $1\text{mg/ml}$  collagen matrix, scale bar:  $10\mu\text{m}$ ; (F) Corresponding box plots for cellular mean intensity of pMLC for FCG and RF conditions, respectively.  $***P < 0.001$ ; two-sided Student's t-test were used. (G) Representative LaminA and  $\gamma\text{H2AX}$  immunofluorescence micrographs of the nuclei in RF and FCG of BJ cells embedded in  $1\text{mg/ml}$  collagen matrix, scale bar:  $10\mu\text{m}$ ; (H-I) Corresponding box plots of LaminA and  $\gamma\text{H2AX}$  intensity per nucleus.  $***P < 0.001$ ; two-sided Student's t-test were used.

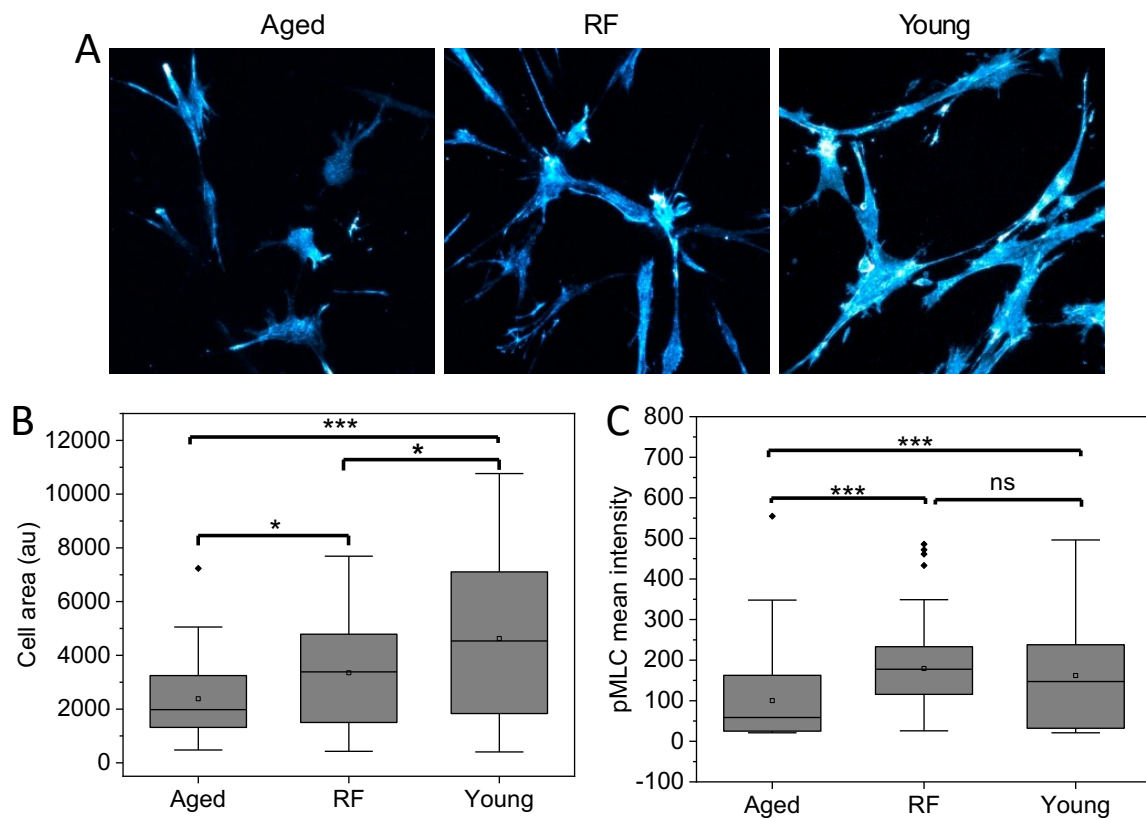

**Figure S12.** (A) Representative confocal micrographs of aged fibroblasts (GM08401) and rejuvenated (RF) young fibroblasts (GM01652), fibroblast embedded in 3D collagen matrix and immuno-stained with pMLC, (magnification: 400X). (B) Cell area plot of these three type of condition as an assay of cell elongation. Error bars represent  $\pm$  SD \* $P < 0.05$ ; \*\*\* $P < 0.001$ ; two-sided Student's t-test was used. (C) Corresponding box plots for cellular mean intensity of pMLC for aged, RF and young conditions. \*\*\* $P < 0.001$ ; two-sided Student's t-test were used.

## SUPPLEMENTARY TABLES

**Table S1. Primers used for qRT-PCR**

| gene    | forward                  | backward                |
|---------|--------------------------|-------------------------|
| Mylpf   | TTCAAGGAGGCGTTCCTACTGTA  | TAGCGTCGAGTTCCTCATTCT   |
| Gapdh   | GACCAGGTTGTCTCCTGCGACTT  | CCATGAGGTCCACCACCCTGTT  |
| Fnl     | AAAAGTTTGTGGGAGTCGTTCT   | GGCCCTGTTCTTCCATCCAG    |
| Col4a1  | CTGGCACAAAAGGGACGAG      | ACGTGGCCGAGAATTTCCACC   |
| Coll1a1 | GCTCCTCTTAGGGGCCACT      | CCACGTCTCACCATTGGGG     |
| Lamc1   | TGCCGGAGTTTGTTAATGCC     | CTGGTTGTTGTAGTCGGTCAG   |
| Actb    | GGCTGTATTCCCCTCCATCG     | GGCTGTATTCCCCTCCATCG    |
| Lmna    | GTACAACCTGCGCTCACGCACCGT | CACTGCGGAAGCTTCGAGTGACT |

**Table S2. Details of primary antibodies**

| Protein     | Supplier name               | Catalog number | Species Reactivity | Applications (Immunofluorescence) | Datasheets and Manufacturer's website                                                                                                                                                                                         |
|-------------|-----------------------------|----------------|--------------------|-----------------------------------|-------------------------------------------------------------------------------------------------------------------------------------------------------------------------------------------------------------------------------|
| gH2AX       | Cell Signaling Technologies | 2577S          | Mouse              | 1:250<br>(for overnight at 4C)    | <a href="https://www.cellsignal.com/products/primary-antibodies/phospho-histone-h2a-x-ser139-antibody/2577">https://www.cellsignal.com/products/primary-antibodies/phospho-histone-h2a-x-ser139-antibody/2577</a>             |
| LaminA      | Abcam                       | ab8980         | Mouse              | 1:200<br>(for overnight at 4C)    | <a href="https://www.abcam.com/lamin-a-antibody-133a2-ab8980.html">https://www.abcam.com/lamin-a-antibody-133a2-ab8980.html</a>                                                                                               |
| pMLC        | Cell Signaling Technologies | 3671S          | Mouse              | 1:200<br>(for 2 days at 4C)       | <a href="https://www.cellsignal.com/products/primary-antibodies/phospho-myosin-light-chain-2-ser19-antibody/3671">https://www.cellsignal.com/products/primary-antibodies/phospho-myosin-light-chain-2-ser19-antibody/3671</a> |
| Fibronectin | Abcam                       | ab2413         | Mouse              | 1:100<br>(for 2 days at 4C)       | <a href="https://www.abcam.com/fibronectin-antibody-ab2413.html">https://www.abcam.com/fibronectin-antibody-ab2413.html</a>                                                                                                   |
| Collagen    | Abcam                       | ab6308         | Mouse              | 1:200<br>(for overnight at 4C)    | <a href="https://www.abcam.com/collagen-i-antibody-col-1-ab6308.html">https://www.abcam.com/collagen-i-antibody-col-1-ab6308.html</a>                                                                                         |
| H3K9Ac      | Abcam                       | ab12179        | Mouse              | 1:200<br>(for overnight at 4C)    | <a href="https://www.abcam.com/histone-h3-acetyl-k9-antibody-ah3-120-chip-grade-ab12179.html">https://www.abcam.com/histone-h3-acetyl-k9-antibody-ah3-120-chip-grade-ab12179.html</a>                                         |

**Table S3. The NCBI-SRA accession IDs of public RNAseq data sets used in this study**

| <b>SRA ID</b> | <b>Description</b>                                        |
|---------------|-----------------------------------------------------------|
| SRR3083897    | E3.5 inner cell mass                                      |
| SRR3083898    | E3.5 inner cell mass                                      |
| SRR3083901    | E4.0 inner cell mass                                      |
| SRR3083902    | E4.0 inner cell mass                                      |
| SRR3083903    | E5.5 epiblast                                             |
| SRR3083904    | E5.5 epiblast                                             |
| SRR3083905    | E5.5 epiblast                                             |
| SRR3083906    | E5.5 epiblast                                             |
| SRR3083907    | E5.5 visceral endoderm                                    |
| SRR3083908    | E5.5 visceral endoderm                                    |
| SRR3083909    | E6.5 epiblast                                             |
| SRR3083910    | E6.5 epiblast                                             |
| SRR3083911    | E6.5 visceral endoderm                                    |
| SRR3083912    | E6.5 visceral endoderm                                    |
| SRR3083913    | E6.5 visceral endoderm                                    |
| SRR2658589    | mESCs from E14                                            |
| SRR2658612    | mESCs from E14                                            |
| SRR2173784    | mESCs from E14 maintained in serum                        |
| SRR2173785    | mESCs from E14 maintained in serum                        |
| SRR2173786    | mESCs from E14 maintained in 2i (PD0325901 and CHIR99021) |
| SRR2173787    | mESCs from E14 maintained in 2i (PD0325901 and CHIR99021) |
| SRR5227280    | F123 mESCs                                                |
| SRR5227281    | F123 mESCs                                                |
| SRR6117986    | MEF_Female                                                |
| SRR6117987    | MEF_Female                                                |
| SRR6117988    | MEF_Female                                                |
| SRR6117992    | MEF_Male                                                  |
| SRR6117993    | MEF_Male                                                  |
| SRR6117994    | MEF_Male                                                  |
